# Supplementary material
Source: PubMed Central journal article supplement (PMC5871535)
Supplement: NIHMS918466-supplement-supplement_1.pdf [file NIHMS918466-supplement-supplement_1.pdf]

**Supplemental Table 1: Patient Characteristics and Outcomes for Outliers in Patients with Plasma Samples**

| Characteristic                                                             | Full Cohort<br>(n=91) | Without<br>Outliers<br>(n=75) | All Outliers<br>(n=16) | Frequent Outliers<br>Only*<br>(n=4) | p-<br>value <sup>†</sup> |
|----------------------------------------------------------------------------|-----------------------|-------------------------------|------------------------|-------------------------------------|--------------------------|
| Age, median (IQR)                                                          | 48.0 (36.0-61.0)      | 48.0 (33.0-61.0)              | 52.0 (44.5-66.5)       | 55.0 (32.5-66.5)                    | 0.24                     |
| Age $\geq$ 65, n (%)                                                       | 21 (23.1)             | 16 (21.3)                     | 5 (31.3)               | 2 (50.0)                            | 0.51                     |
| Sex (male), n (%)                                                          | 58 (63.7)             | 46 (61.3)                     | 12 (75.0)              | 4 (100.0)                           | 0.40                     |
| Race (white), n (%)                                                        | 57 (62.6)             | 46 (61.3)                     | 11 (68.8)              | 2 (50.0)                            | 0.77                     |
| Admission SOFA Score, median (IQR) (n=84)                                  | 5.0 (4.0-8.0)         | 5.0 (4.0-8.0)                 | 6.0 (4.0-9.0)          | 9.5 (5.5-11.5)                      | 0.30                     |
| Mechanism (flame), n (%)                                                   | 85 (93.4)             | 70 (93.3)                     | 15 (93.8)              | 4 (100.0)                           | 0.99                     |
| Inhalation Injury (Yes), n (%)                                             | 76 (83.5)             | 62 (82.7)                     | 14 (87.5)              | 4 (100.0)                           | 0.99                     |
| Inhalation Injury Grade, median (IQR)                                      | 2.0 (1.0-3.0)         | 2.0 (1.0-3.0)                 | 2.0 (1.0-3.0)          | 3.0 (2.0-3.0)                       | 0.85                     |
| TBSA, % median (IQR)                                                       | 11.5 (1.0-28.0)       | 11.0 (1.0-27.0)               | 17.0 (1.5-30.0)        | 17.0 (7.5-25.0)                     | 0.47                     |
| Baux Score                                                                 | 90.0 (74.4-117.7)     | 90.0 (74.4-117.7)             | 93.9 (72.2-111.5)      | 96.9 (91.8-101.5)                   | 0.94                     |
| Revised Baux Score, median (IQR)                                           | 83.5 (65.0-104.0)     | 82.0 (60.0-102.0)             | 84.0 (77.5-112.5)      | 79.5 (71.5-94.0)                    | 0.10                     |
| Lowest PaO <sub>2</sub> :FiO <sub>2</sub> ratio (initial 48 hours), median | 183.5 (131.8-256.3)   | 185.8 (122.5-268.8)           | 167.2 (144.0-201.3)    | 166.5 (142.0-195.2)                 | 0.43                     |
| % COHB, median (IQR)                                                       | 6.6 (2.6-13.6)        | 6.8 (2.5-13.4)                | 5.7 (2.6-24.0)         | 16.5 (4.0-29.5)                     | 0.94                     |
| 24 hr fluid resuscitation (cc/kg), median (IQR)                            | 77.9 (39.5-146.6)     | 76.0 (34.8-133.3)             | 105.4 (56.2-162.0)     | 83.8 (53.3-156.0)                   | 0.21                     |
| 72 hr fluid resuscitation (cc/kg), median (IQR)                            | 187.5 (112.7-305.4)   | 186.2 (112.7-274.3)           | 217.8 (115.4-339.9)    | 193.4 (124.6-303.7)                 | 0.85                     |
| Sepsis (N=103)                                                             | 17 (18.9)             | 12 (16.2)                     | 5 (31.3)               | 2 (50.0)                            | 0.17                     |
| 28-day Ventilator-Free Days                                                | 5.0 (0.0-23.0)        | 11.0 (0.0-24.0)               | 0.0 (0.0-4.5)          | 1.5 (0.0-14.0)                      | 0.09                     |
| 28-day ICU-Free Days                                                       | 0.0 (0.0-15.0)        | 0.0 (0.0-17.0)                | 0.0 (0.0-2.0)          | 2.0 (0.0-10.0)                      | 0.07                     |
| Acute Respiratory Distress Syndrome                                        | 62 (68.9)             | 51 (68.9)                     | 11 (68.8)              | 3 (75.0)                            | 0.99                     |
| In-Hospital Death                                                          | 18 (20.0)             | 13 (17.6)                     | 5 (31.3)               | 2 (50.0)                            | 0.30                     |

Outliers: values with more than 3 standard deviations from the mean. \*Frequent means  $\geq$  3 outliers for a patient. <sup>†</sup> Comparison by Wilcoxon-Mann-Whitney test for medians and Fisher's Exact test for proportions between 'Without Outliers' cohort and 'All Outliers' cohort

**Supplemental Table 2. Patient Characteristics and Outcomes for Outliers in Patients with BAL Samples**

| Characteristic                                                             | Full Cohort (n=103) | Without Outliers (n=84) | All Outliers (n=19) | Frequent Outliers Only* (n=7) | p-value |
|----------------------------------------------------------------------------|---------------------|-------------------------|---------------------|-------------------------------|---------|
| Age, median (IQR)                                                          | 48.5 (36.5-61.5)    | 49.0 (38.0-64.0)        | 44.0 (30.0-61.0)    | 53.0 (24.0-67.0)              | 0.40    |
| Age≥65, n (%)                                                              | 23 (22.3)           | 20 (23.8)               | 3 (15.8)            | 2 (28.6)                      | 0.55    |
| Sex (male), n (%)                                                          | 67 (64.4)           | 53 (63.1)               | 14 (73.7)           | 3 (42.9)                      | 0.44    |
| Race (white), n (%)                                                        | 63 (61.2)           | 55 (65.5)               | 8 (42.1)            | 5 (71.4)                      | 0.06    |
| Admission SOFA Score, median (IQR) (n=84)                                  | 5 (4-8)             | 5 (4-8)                 | 7 (4-9)             | 7.0 (4.0-9.0)                 | 0.17    |
| Mechanism (flame), n (%)                                                   | 97 (94.2)           | 81 (96.4)               | 16 (84.2)           | 5 (71.4)                      | 0.04    |
| Inhalation Injury (Yes), n (%)                                             | 86 (83.0)           | 70 (83.3)               | 16 (84.2)           | 6 (85.7)                      | 0.93    |
| Inhalation Injury Grade, median (IQR)                                      | 2 (1-3)             | 2 (1-3)                 | 2 (1-4)             | 4 (2-4)                       | 0.12    |
| TBSA, % median (IQR)                                                       | 12.8 (1.0-30.0)     | 14.3 (1.0-30.0)         | 9.0 (1.0-34.0)      | 7.0 (4.0-9.0)                 | 0.86    |
| Baux Score                                                                 | 93.9 (75.1-121.2)   | 93.0 (76.5-121.2)       | 98.8 (69.4-124.5)   | 69.4 (27.0-115.4)             | 0.98    |
| Revised Baux Score*, median (IQR)                                          | 83.8 (66.0-104.5)   | 82.5 (63.5-106.0)       | 84.0 (74.0-103.0)   | 93.0 (84.0-105.0)             | 0.40    |
| Lowest PaO <sub>2</sub> :FiO <sub>2</sub> ratio (initial 48 hours), median | 182 (131.8-253.8)   | 183.0 (130.0-251.3)     | 160.0 (132.5-285.0) | 164.4 (72.0-357.5)            | 0.84    |
| % COHB, median (IQR)                                                       | 5.7 (2.5-13.4)      | 5.0 (2.6-11.5)          | 9.8 (1.5-26.1)      | 19.9 (2.5-39.7)               | 0.31    |
| 24 hr fluid resuscitation (cc/kg), median (IQR)                            | 79.5 (38.8-156.1)   | 90.2 (42.2-171.2)       | 56.1 (18.1-111.3)   | 33.7 (26.8-66.3)              | 0.03    |
| 72 hr fluid resuscitation (cc/kg), median (IQR)                            | 194.7 (112.7-323.0) | 202.5 (118.7-328.7)     | 112.2 (55.4-273.7)  | 100.5 (45.8-142.9)            | 0.03    |
| Sepsis (N=103)                                                             | 20 (19.6)           | 13 (15.7)               | 7 (36.8)            | 2 (28.6)                      | 0.05    |
| 28-day Ventilator-Free Days                                                | 3.0 (0.0-23.0)      | 8.5 (0.0-24.0)          | 0.0 (0.0-6.0)       | 0.0 (0.0-6.0)                 | 0.05    |
| 28-day ICU-Free Days                                                       | 0.0 (0.0-15.0)      | 0.0 (0.0-16.0)          | 0.0 (0.0-5.0)       | 0.0 (0.0-5.0)                 | 0.11    |
| Acute Respiratory Distress Syndrome                                        | 69 (67.0)           | 54 (64.3)               | 15 (79.0)           | 7 (100.0)                     | 0.21    |
| In-Hospital Death                                                          | 22 (21.6)           | 19 (22.3)               | 3 (15.8)            | 1 (14.3)                      | 0.76    |

Outliers: values with more than 3 standard deviations from the mean. \*Frequent means ≥ 3 outliers for a patient. † Comparison by Wilcoxon-Mann-Whitney test for medians and Fisher's Exact test for proportions between 'Without Outliers' cohort and 'All Outliers' cohort
